# Supplementary material
Source: PubMed Central journal article supplement (PMC10290522)
Supplement: NIHMS1667183-supplement-3.pdf [file NIHMS1667183-supplement-3.pdf]

## Supplemental Figure S3

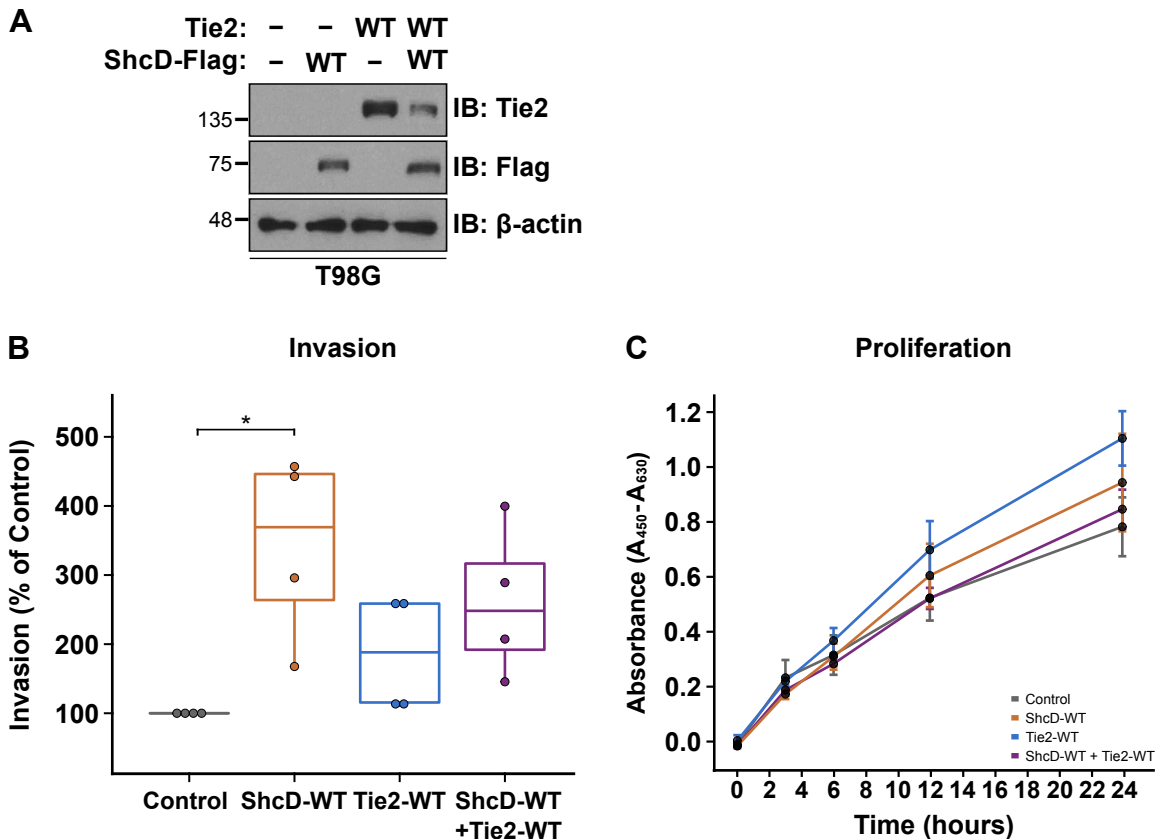

**Figure S3: Stable T98G cells expressing ShcD-WT show increased invasion.** (A) Western blot showing expression levels of wild-type ShcD and Tie2 proteins in stable T98G cells. (B) Stable cell lines were subjected to Transwell invasion assays using Matrigel™. Cells invaded toward 10% FBS for 20 hours and were then fixed and stained with crystal violet. Values are presented as percent of control. T98G cells expressing ShcD-WT alone showed significantly increased invasion compared to control. Co-expression of ShcD with Tie2 enhanced the Tie2-mediated increase in invasion;  $n = 4$  biological replicates (C) WST-1 assay over 24 hours showing comparable proliferation rates of all four stable cell lines;  $n = 4$  biological replicates. IB: Immunoblot; \* $P < 0.05$ .
