# Supplementary material
Source: PubMed Central journal article supplement (PMC10290522)
Supplement: NIHMS1667183-supplement-7.pdf [file NIHMS1667183-supplement-7.pdf]

# Supplemental Figure S7

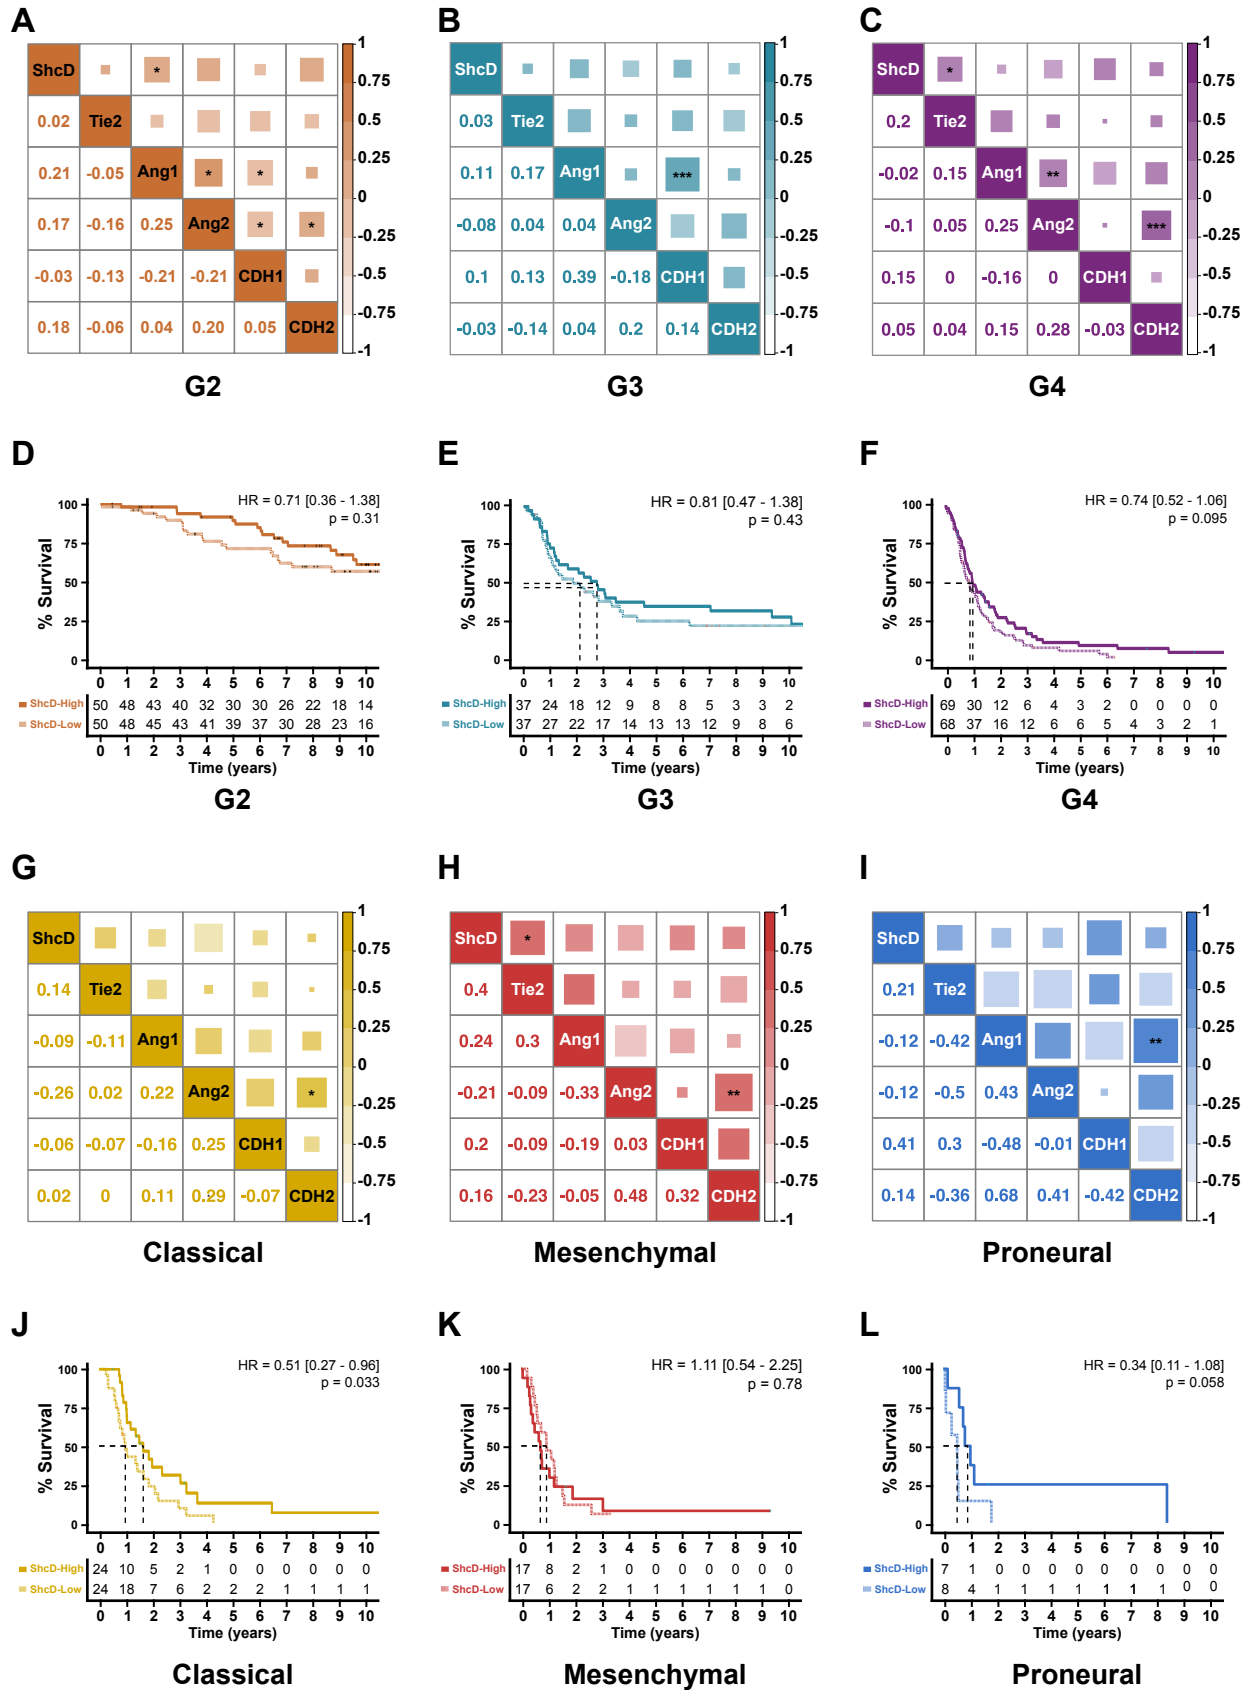

**Figure S7: ShcD mRNA expression is correlated with Tie2 in mesenchymal subtype GBM in the CGGA\_325 dataset.** (A-C) Correlation analysis of ShcD mRNA expression with components of the Tie2 signaling pathway and EMT markers in relation to tumor grades in the CGGA\_325 dataset. Lower triangles represent Pearson's correlation coefficients. Upper triangles represent *P*-values indicating significance of correlation for each pair. The size of shaded squares is inversely proportional to *P*-values, and is also indicated with \* where significant. (D-F) Analysis of overall survival over a 10-year period for patients with high or low levels of ShcD expression in relation to tumor grades. (G-I) Correlation analysis of ShcD mRNA expression with components of the Tie2 signaling pathway and EMT markers in relation to molecular subtypes of GBM. (J-L) Analysis of overall survival over a 10-year period for patients with high or low levels of ShcD expression in relation to tumor subtypes. G2: Grade 2; G3: Grade 3; G4: Grade 4; \**P* < 0.05; \*\* *P* < 0.01; \*\*\**P* < 0.001.
